# Supplementary material
Source: PubMed Central journal article supplement (PMC4426584)
Supplement: SD5.pdf [file SD5.pdf]

SUPPLEMENTAL TABLE 1  
Associations at baseline and posttreatment visits of pattern B with potential etiologies

| Potential etiology | Prevalence ratio (95% CI) for pattern B                                            |     |                                 |     |                                                                  |     |                                                                  |     |
|--------------------|------------------------------------------------------------------------------------|-----|---------------------------------|-----|------------------------------------------------------------------|-----|------------------------------------------------------------------|-----|
|                    | Baseline visit                                                                     |     |                                 |     | Posttreatment visit                                              |     |                                                                  |     |
|                    | PR (95% CI)                                                                        | N   | aPR* (95% CI)                   | N   | PR (95% CI)                                                      | N   | aPR* (95% CI)                                                    | N   |
|                    | Schistosomiasis infection status                                                   |     |                                 |     |                                                                  |     |                                                                  |     |
| Egg+               | (vs. Egg-/Ab-)<br>1.6 (0.6–4.5)                                                    | 197 | (vs. Egg-/Ab-)<br>1.5 (0.5–4.9) | 189 | (vs. Egg-)<br>0.6 (0.3–1.2)                                      | 180 | (vs. Egg-)<br>0.7 (0.4–1.3)                                      | 174 |
| Egg-/Ab+           | (vs. Egg-/Ab-)<br>0.8 (0.2–3.0)                                                    | 197 | (vs. Egg-/Ab-)<br>1.0 (0.3–3.7) | 189 | NA                                                               |     | NA                                                               |     |
|                    | <i>S. mansoni</i> infection intensity by Kato-Katz (vs. light) among egg+ subjects |     |                                 |     |                                                                  |     |                                                                  |     |
| Moderate           | 3.9 (0.5–31.1)                                                                     | 89  | 2.7 (0.5–16.0)                  | 86  | 0.2 (0.0–1.3)                                                    | 62  | <b>0.2 (0.0–0.8)</b>                                             | 60  |
| Heavy              | <b>9.7 (2.9–32.4)</b>                                                              |     | <b>11.4 (2.7–48.3)</b>          |     | 0.6 (0.2–2.1)                                                    |     | 0.6 (0.2–2.0)                                                    |     |
| Malaria            | (smear)<br>1.9 (0.7, 5.8)                                                          | 197 | 1.0 (0.2, 5.4)                  | 189 | (smear)<br><b>1.8 (1.3–2.3)</b><br>(RDT)<br><b>2.0 (1.3–3.2)</b> | 180 | (smear)<br><b>1.6 (1.2–2.1)</b><br>(RDT)<br><b>2.1 (1.3–3.2)</b> | 174 |

CI = confidence interval; PR = prevalence ratio. Bolded values are statistically significant at  $P < 0.05$ .  
\*Adjusted for sex and age.

SUPPLEMENTAL TABLE 2

Main paper Table 2, with  $P$  values displayed: associations at baseline visit of morbidities and findings with *S. mansoni* infection status and liver pattern B

| Finding                 | Schistosomiasis (egg+ or Ab+) |                   |     |                           |                   |     | Pattern B       |      |     |                      |             |     |
|-------------------------|-------------------------------|-------------------|-----|---------------------------|-------------------|-----|-----------------|------|-----|----------------------|-------------|-----|
|                         | Unadjusted                    |                   |     | Adjusted*                 |                   |     | Unadjusted      |      |     | Adjusted*            |             |     |
|                         | PR (95% CI)                   | P                 | N   | PR (95% CI)               | P                 | N   | PR (95% CI)     | P    | N   | PR (95% CI)          | P           | N   |
| Anemia                  | 1.1 (0.9, 1.3)                | 0.25              | 193 | 1.1 (0.9, 1.4)            | 0.17              | 186 | 0.9 (0.7–1.2)   | 0.43 | 195 | 0.9 (0.6–1.2)        | 0.32        | 188 |
| Undernutrition          | 0.8 (0.4, 1.5)                | 0.42              | 171 | 0.8 (0.4, 1.4)            | 0.37              | 167 | 1.6 (1.0–2.7)   | 0.07 | 173 | <b>1.8 (1.1–2.9)</b> | <b>0.03</b> | 169 |
| Left lobe hepatomegaly  | <b>1.5 (1.0, 2.2)</b>         | <b>0.04</b>       | 179 | <b>1.4 (1.0, 2.1)</b>     | 0.08              | 172 | 0.6 (0.3–1.4)   | 0.26 | 181 | 0.7 (0.3–1.5)        | 0.31        | 174 |
| Splenomegaly            | <b>2.4 (1.4, 4.2)</b>         | <b>0.001</b>      | 182 | <b>2.1 (1.2, 3.7)</b>     | <b>0.01</b>       | 174 | 1.5 (0.9–2.6)   | 0.16 | 184 | 1.7 (0.9–3.0)        | 0.10        | 176 |
| AST (units/L)†          | -5.1 (-10.8, 0.5)             | 0.08              | 177 | <b>-5.4 (-10.3, -0.6)</b> | <b>0.03</b>       | 171 | 1.5 (-6.6–9.7)  | 0.71 | 179 | 2.2 (-5.7–10.2)      | 0.58        | 173 |
| ALT (units/L)†          | 0.2 (-3.7, 4.1)               | 0.90              | 177 | -1.0 (-4.3, 2.3)          | 0.54              | 171 | 0.1 (-4.5–4.7)  | 0.97 | 179 | 0.9 (-2.9–4.8)       | 0.64        | 173 |
| Log bilirubin (μmol/L)‡ | <b>-0.2 (-0.3, -0.1)</b>      | <b>&lt; 0.001</b> | 177 | <b>-0.2 (-0.3, -0.1)</b>  | <b>&lt; 0.001</b> | 171 | -0.8 (-1.8–0.9) | 0.15 | 179 | -1.3 (-1.8–1.0)      | 0.10        | 173 |

ALT = alanine aminotransferase; AST = aspartate aminotransferase; CI = confidence interval; PR = prevalence ratio. Bolded values are statistically significant at  $P < 0.05$ .

\*Adjusted for sex and age.

†Increase (units/L) with presence of predictor.

‡Ratio to value in uninfected.

SUPPLEMENTAL TABLE 3

Main paper Table 3, with *P* values displayed: unadjusted and adjusted associations at posttreatment visit of morbidities and findings with *S. mansoni* infection status and malaria

| Finding                | Schistosomiasis (egg+ or Ab+) |                   |              |           |            |                   | Malaria (RDT positive) |          |            |                   |             |          |            |                   |             |     |            |                   |                 |     |            |                   |                 |
|------------------------|-------------------------------|-------------------|--------------|-----------|------------|-------------------|------------------------|----------|------------|-------------------|-------------|----------|------------|-------------------|-------------|-----|------------|-------------------|-----------------|-----|------------|-------------------|-----------------|
|                        | Unadjusted                    |                   |              | Adjusted* |            |                   | Unadjusted             |          |            | Adjusted†         |             |          |            |                   |             |     |            |                   |                 |     |            |                   |                 |
|                        | PR                            | (95% CI)          | <i>P</i>     | PR        | (95% CI)   | <i>P</i>          | PR                     | (95% CI) | <i>P</i>   | PR                | (95% CI)    | <i>P</i> |            |                   |             |     |            |                   |                 |     |            |                   |                 |
| Left lobe hepatomegaly | <b>1.3</b>                    | <b>(1.1, 1.6)</b> | <b>0.001</b> | 1.52      | <b>1.4</b> | <b>(1.1, 1.6)</b> | <b>0.001</b>           | 1.47     | <b>0.7</b> | <b>(0.4, 1.0)</b> | <b>0.04</b> | 1.47     | <b>1.3</b> | <b>(1.0, 1.7)</b> | <b>0.03</b> | 152 | <b>1.3</b> | <b>(1.0, 1.7)</b> | <b>0.03</b>     | 152 | <b>1.3</b> | <b>(1.0, 1.7)</b> | <b>0.03</b>     |
| Splenomegaly           | 1.0                           | (0.6, 1.6)        | 0.94         | 158       | 0.9        | (0.6, 1.6)        | 0.82                   | 153      | 1.2        | (0.8, 1.7)        | 0.46        | 158      | 1.2        | (0.8, 1.7)        | 0.40        | 153 | <b>2.8</b> | <b>(2.0, 4.0)</b> | < <b>0.0001</b> | 158 | <b>2.7</b> | <b>(1.9, 4.0)</b> | < <b>0.0001</b> |

CI = confidence interval; PR = prevalence ratio. Bolded values are statistically significant at *P* < 0.05.

\* Values drawn from the same model (including sex, age, malaria on RDT, and current *S. mansoni* infection by stool egg status).

† Gender and age.

SUPPLEMENTAL TABLE 4

Main paper Table 2, restricted to children < 94 cm, with *P* values displayed: associations at baseline visit of morbidities and findings with *S. mansoni* infection status and liver pattern B

| Finding                 | Schistosomiasis (egg+ or Ab+) |                     |              |           |             |                      | Pattern B     |           |            |                    |                 |          |            |                   |                 |
|-------------------------|-------------------------------|---------------------|--------------|-----------|-------------|----------------------|---------------|-----------|------------|--------------------|-----------------|----------|------------|-------------------|-----------------|
|                         | Unadjusted                    |                     |              | Adjusted* |             |                      | Unadjusted    |           |            | Adjusted*          |                 |          |            |                   |                 |
|                         | PR                            | or coefficient      | (95% CI)     | <i>P</i>  | PR          | or coefficient       | (95% CI)      | <i>P</i>  | PR         | or coefficient     | (95% CI)        | <i>P</i> |            |                   |                 |
| Anemia                  | <b>1.2</b>                    | <b>(1.001, 1.4)</b> | <b>0.049</b> | 98        | 1.2         | (1.0, 1.5)           | 0.08          | 95        | 0.9        | (0.7, 1.1)         | 0.46            | 99       | 0.9        | (0.7, 1.2)        | 0.50            |
| Undernutrition          | 0.9                           | (0.5, 1.5)          | 0.70         | 84        | 0.9         | (0.5, 1.7)           | 0.82          | 82        | <b>1.3</b> | <b>(1.03, 1.7)</b> | <b>0.03</b>     | 85       | <b>1.4</b> | <b>(1.1, 1.8)</b> | < <b>0.01</b>   |
| Left lobe hepatomegaly  | 1.7                           | (0.9, 3.0)          | 0.10         | 82        | 1.5         | (0.8, 2.7)           | 0.17          | 80        | 0.7        | (0.2, 2.7)         | 0.58            | 83       | 0.6        | (0.2, 2.6)        | 0.51            |
| Splenomegaly            | <b>6.2</b>                    | <b>(1.1, 33.7)</b>  | <b>0.04</b>  | <b>85</b> | <b>5.2</b>  | <b>(1.001, 27.3)</b> | <b>0.0499</b> | 82        | <b>3.8</b> | <b>(2.3, 6.4)</b>  | < <b>0.0001</b> | 86       | <b>3.4</b> | <b>(2.0, 5.8)</b> | < <b>0.0001</b> |
| AST (units/L)†          | -3.9                          | (-17.1, 9.4)        | 0.57         | 89        | -5.6        | (-17.5, 6.3)         | 0.36          | 87        | -3.9       | (-22.9, 15.1)      | 0.69            | 90       | -4.4       | (-21.2, 12.5)     | 0.61            |
| ALT (units/L)†          | 1.8                           | (-7.0, 10.6)        | 0.69         | 89        | -0.8        | (-8.1, 6.6)          | 0.84          | 87        | -0.9       | (-11.1, 9.3)       | 0.86            | 90       | 0.5        | (-8.1, 9.2)       | 0.90            |
| Log bilirubin (umol/L)‡ | -0.2                          | (-0.3, 0.01)        | 0.06         | 89        | <b>-0.2</b> | <b>(-0.4, -0.1)</b>  | < <b>0.01</b> | <b>87</b> | 0.4        | (-0.1, 0.8)        | 0.15            | 90       | 0.3        | (-0.2, 0.8)       | 0.22            |

ALT = alanine aminotransferase; AST = aspartate aminotransferase; CI = confidence interval; PR = prevalence ratio. Bolded values are statistically significant at *P* < 0.05.

\* Adjusted for sex and age.

† Increase (units/L) with presence of predictor.

‡ Ratio to value in uninfected.

SUPPLEMENTAL TABLE 5

Main paper Table 3, restricted to children < 94 cm, with *P* values displayed: unadjusted and adjusted associations at posttreatment visit of morbidities and findings with *S. mansoni* infection status and malaria

| Finding                | Schistosomiasis (egg+ or Ab+) |               |          |                       |              |          | Pattern B      |          |          |                |          |          | Malaria (RDT positive) |               |          |                       |               |          |
|------------------------|-------------------------------|---------------|----------|-----------------------|--------------|----------|----------------|----------|----------|----------------|----------|----------|------------------------|---------------|----------|-----------------------|---------------|----------|
|                        | Unadjusted                    |               |          | Adjusted*             |              |          | Unadjusted     |          |          | Adjusted†      |          |          | Unadjusted             |               |          | Adjusted*             |               |          |
|                        | PR (95% CI)                   | <i>P</i>      | <i>N</i> | PR (95% CI)           | <i>P</i>     | <i>N</i> | PR (95% CI)    | <i>P</i> | <i>N</i> | PR (95% CI)    | <i>P</i> | <i>N</i> | PR (95% CI)            | <i>P</i>      | <i>N</i> | PR (95% CI)           | <i>P</i>      | <i>N</i> |
| Left lobe hepatomegaly | <b>1.7 (1.2, 2.4)</b>         | < <b>0.01</b> | 73       | <b>1.8 (1.3, 2.6)</b> | <b>0.001</b> | 69       | 0.9 (0.5, 1.6) | 0.66     | 73       | 0.8 (0.5, 1.4) | 0.41     | 71       | <b>1.5 (1.1, 2.1)</b>  | <b>0.01</b>   | 73       | <b>1.8 (1.3, 2.6)</b> | <b>0.03</b>   | 71       |
| Splenomegaly           | 1.1 (0.6, 1.9)                | 0.87          | 75       | 0.9 (0.5, 1.6)        | 0.62         | 73       | 1.1 (0.6, 1.9) | 0.79     | 77       | 0.8 (0.6, 1.2) | 0.39     | 75       | <b>3.4 (1.9, 6.1)</b>  | < <b>0.01</b> | 77       | <b>3.0 (1.6, 5.8)</b> | < <b>0.01</b> | 75       |

CI = confidence interval; PR = prevalence ratio. Bolded values are statistically significant at *P* < 0.05.

\* Values drawn from the same model (including sex, age, malaria on RDT, and current *S. mansoni* infection by stool egg status).

† Gender and age.
